# Supplementary material
Source: PubMed Central journal article supplement (PMC3276066)
Supplement: NIHMS353534-supplement-supplement_1.pdf [file NIHMS353534-supplement-supplement_1.pdf]

30. Auble, D. T., Wang, D., Post, K. W. & Hahn, S. Molecular analysis of the SNF2/SWI2 protein family member MOT1, an ATP-driven enzyme that dissociates TATA-binding protein from DNA. *Molecular and cellular biology* 17, 4842-4851, (1997).

## Methods

### Protein preparation

*E. coli* BL21 Rosetta cells (Novagen) were used for expressing *EcTBP* and *EcTBP*<sup>K103E</sup> (pET28 (Novagen)) or for co-expressing *EcTBP* and *EcMot1*<sup>NTD</sup> (residues 1–779) (pET-DUET (Novagen)). Purification of proteins was done by Ni<sup>2+</sup>-affinity chromatography (QIAGEN) using a high salt buffer at pH 8. Further purification of *EcTBP* was achieved by anion exchange chromatography (HiTrap SP HP, GE Healthcare). For crystallization of *EcTBP*, the His-Tag was removed by TEV protease digestion. Final purification of all proteins was performed by size exclusion chromatography (Superdex S200, GE Healthcare). Purification of *EcTBP* and *EcMot1*<sup>NTD $\Delta$ latch</sup> ( $\Delta$ latch =  $\Delta$ 96–132) or selenomethionine labelled *EcTBP* and *EcMot1*<sup>NTD</sup> was performed accordingly.

Sequences encoding for full-length *EcMot1* (residues 1–1275), *EcMot1* <sup>$\Delta$ CT</sup> (residues 1–1016), *EcMot1*<sup>NTD</sup> (residues 1–779) and *EcMot1* <sup>$\Delta$ latch</sup> ( $\Delta$ 96–132) including an N-terminal His<sub>10</sub>-tag were cloned into pFBDM transfer vector (Invitrogen). *EcMot1*<sup>E912Q</sup> (Walker B mutant) was generated by site-directed mutagenesis of pFBDM-*EcMot1*. Transposition of the coding sequence into MultiBac baculoviral DNA was performed in *E. coli* DH10MultiBac<sup>Cre</sup> cells<sup>31</sup>. Isolated bacmid DNA was used for transfection of *Trichoplusia ni* High Five<sup>TM</sup> insect cells (Invitrogen) to produce baculovirus for large scale infections. Purification of proteins was done by Ni<sup>2+</sup>-affinity chromatography (QIAGEN) using buffer containing 50 mM Mes pH 6.5, 200 mM NaCl, 12.5/300 mM Imidazole and 10 mM  $\beta$ -mercaptoethanol

(*EcMot1*<sup>NTD</sup>/*EcMot1*<sup>NTD $\Delta$ latch</sup>) or 50 mM Tris pH 7.5, 400 mM NaCl, 10 mM  $\beta$ -mercaptoethanol, 12.5/300 mM Imidazole and 10% Glycerol (v/v) (*EcMot1*/*EcMot1* <sup>$\Delta$ CT</sup>/*EcMot1* <sup>$\Delta$ latch</sup>). Further purification was achieved by ion exchange chromatography (HiTrap Q HP, GE Healthcare). For crystallization of the complex, *EcTBP* was added in excess amounts to *EcMot1*. Final purification of the **proteins** was done by size exclusion chromatography (Superdex S200, GE Healthcare). The preparation of *EcMot1*<sup>BeF</sup>:*EcTBP* (*EcMot1* with ADP-BeF<sub>3</sub><sup>-</sup>) was performed as described<sup>32</sup>.

### Crystallization

Proteins were crystallized by hanging drop vapour diffusion at 18°C in a mixture of 1  $\mu$ l protein (10 mg/ml *EcTBP* and 5 mg/ml *EcMot1*<sup>NTD</sup>:*EcTBP*) and 1  $\mu$ l precipitant (0.1 M Mes pH 6.5, 2 M NaCl, 4% Acetone for *EcTBP*; 50 mM Mes pH 6, 200 mM Ammoniumacetate, 5% MPD, 4% Peg 3350, 200 mM NDSB-201 for *EcMot1*<sup>NTD</sup>:*EcTBP*). Crystals were cryoprotected with 1,2-Ethandiol (*EcTBP*) or 2,3-Butanediol (*EcMot1*<sup>NTD</sup>:*EcTBP*) and flash frozen in liquid nitrogen.

### Structure determination

All data were processed with XDS<sup>33</sup>. The structure of *EcTBP* was solved by molecular replacement using Phaser<sup>34</sup> and yeast TBP (1TBP) as a model. The structure of *EcMot1*<sup>NTD</sup>:*EcTBP* was solved by a single anomalous dispersion experiment using SeMet data in combination with molecular replacement using *EcTBP* structure as a partial model (Phaser<sup>34</sup>). Heavy atom sites were obtained with SHARP<sup>35</sup> and initial automatic model building was performed with Buccaneer<sup>36</sup>. Model building and refinement was conducted in Coot<sup>37</sup> and PHENIX<sup>38</sup>, respectively. Figures were prepared in Pymol<sup>39</sup> or Chimera<sup>40</sup>.

### **Footprinting assays**

Footprinting assays were performed as described previously<sup>41</sup>. Reactions contained 20 nM *Ec*TBP, 30 nM *Ec*Mot1, and 50 mM ATP as indicated. Following incubation of TBP and DNA together for 20 min at 37° C, Mot1 was added with or without ATP for 5 min prior to DNase I digestion and sample processing.

### **ATPase assay**

The rates of ATP hydrolysis were measured as described previously<sup>41</sup> in buffer containing 4 mM Tris-Cl pH 8, 60 mM KCl, 5 mM MgCl<sub>2</sub>, 4% Glycerol (v/v), 100 mg/ml BSA, and 1 mM DTT at 22° C.

### **Analytic Gel Filtration**

Analytical size exclusion experiments were performed on Ettan LC system (GE Healthcare, Superose 12 PC 3.2/30) according to the manufacturer's instructions (50 mM Hepes pH 8/50 mM Mes pH 6.5, 200 mM NaCl and 2 mM DTT)

### **Electrophoretic mobility shift assays (EMSAs)**

These assays employed a radiolabeled fragment of the Adenovirus Major Late Promoter<sup>41</sup>. Typically, <1 nM DNA was incubated with 15-20 nM *Ec*TBP for 20 min at 37° C in the same buffer as was used for ATPase assays, then 30 nM Mot1 (or a Mot1 mutant) was added with or without 50 mM ATP for 5 min prior to loading on a gel as previously described<sup>42</sup>.

### **Dissociation kinetic assays**

Kinetic analysis of the dissociation reaction was performed by addition of ATP to pre-formed ternary complexes under the conditions used in the experiment shown in Figure 2e. Reactions contained radiolabeled DNA (<1 nM), 20 nM *Ec*TBP and either 30 nM WT *Ec*Mot1 or 30 nM *Ec*Mot1<sup>Δlatch</sup>. *Ec*TBP was incubated with the radiolabeled DNA template for 20 min, followed by addition of *Ec*Mot1 or *Ec*Mot1<sup>Δlatch</sup> for 10 min. ATP was added to 100 μM for 2 to 20 min, and reaction products were resolved at the indicated times on nondenaturing gels. To quantify the extent of complex dissociation at each time point, the free DNA band was quantified and expressed as a proportion of the free DNA present in reactions with no added protein. The results are expressed as the average +/- standard error associated with two independent experiments.

### **FeBABE cleavage assays**

FeBABE-mediated protein cleavage have been described<sup>43,44</sup>. The yeast system was used to take advantage of an antibody raised to the C-terminus of yeast Mot1<sup>45</sup>.

### **Static light scattering**

For molecular weight determination of proteins samples (2-4 mg/ml, with 40 mM Hepes pH 8, 200 mM NaCl, 2 mM DTT as a running buffer) by static light scattering we used a combination of a Viscotek 270 detector and an Viscotek VE-3580 refractive index monitor connected to a microscale HPLC system (AEKTAmicro, GE Healthcare) equipped with an analytical size exclusion column Superdex S200 15/150 GL (GE Healthcare). Data analysis was performed using the OmniSEC-Software (Viscotek) using BSA (Thermo Fisher) as a reference for calibration. The chromatographs of the size exclusion monitored by UV-absorption at 280 nm and the subsequent refractive index and light scattering chromatographs all showed a single prominent peak indicating a homogenous sample. Plots of the determined

molecular weight vs. elution volumes for the evaluated peaks all showed stable molecular weights for the chosen peak areas.

### **Dynamic light scattering**

Dynamic light scattering was measured using a Viscotek/Malvern Instruments 802DLS system. Protein samples (1 mg/ml in size exclusion buffer) were centrifuged and the supernatant was measured at 20° C using fluorescence cuvettes. At least 10 autocorrelation curves per sample were recorded, averaged and evaluated using the OmniSIZE Software and the mass model for globular proteins. All samples showed intensity distributions indicating a homogenous sample with a single peak at the given hydrodynamic radius.

### **Electron microscopy**

3.5  $\mu$ l (10-30  $\mu$ g/ml) of freshly prepared protein sample was applied to pre-coated Quantifoil holey carbon supported grids and negatively stained. Data was collected under low dose conditions at a nominal magnification of 90,000 X and a nominal defocus of – 0.9  $\mu$ m using an Eagle 2048 x 2048 pixel CCD camera (FEI Company, Eindhoven, Netherlands) with a resolution of 30  $\mu$ m/pixel (3.31  $\text{\AA}$ /pixel object scale). 5518 (*EcMot1*<sup>BeF</sup>:*EcTBP*), 7737 (*EcMot1* <sup>$\Delta$ CT</sup>:*EcTBP*; C-terminally truncated *EcMot1*) and 12558 (*EcMot1*<sup>E912Q</sup> Walker mutant) particles were picked using boxer<sup>46</sup>. Initial image processing was done using IMAGIC-5<sup>47</sup>. The images were normalized, filtered at the first zero without CTF correction and centred by iteratively aligning them to their rotationally averaged sum. Initial class averages were obtained by 2-3 rounds of multivariate statistical analysis followed by multi-reference alignment using homogenous classes as references. The datasets were classified into 10-20 images per class. A low resolution density map was created by angular reconstitution

and used as an initial model for projection matching in EMAN 1.9<sup>46</sup>. The models underwent between 8 and 24 rounds of refinement at an angular increment of up to 5 degrees until angular assignment was stable. The final reconstructions comprised approx. 90% of the original dataset. All visualization and rigid body fittings were carried out using the UCSF Chimera package<sup>40</sup>. Surface representations show density rendered at a threshold accounting for the expected molecular mass of the complexes: *EcMot1*<sup>ΔCT</sup>:*EcTBP* (140 kDa; 170226 Å<sup>2</sup>), *EcMot1*<sup>E912Q</sup> (145 kDa; 172366 Å<sup>2</sup>), *EcMot1*<sup>BeF</sup>:*EcTBP* (169 kDa; 198984 Å<sup>2</sup>). Crystal structures and density maps were merged in VMD using MDFF as described<sup>48</sup>. Difference densities were created by subtracting maps from one another that were rendered at a threshold accounting for the expected molecular mass of the complex.

31. Berger, I., Fitzgerald, D. J. & Richmond, T. J. Baculovirus expression system for heterologous multiprotein complexes. *Nat Biotechnol* **22**, 1583-1587, (2004).
32. Kagawa, R., Montgomery, M. G., Braig, K., Leslie, A. G. & Walker, J. E. The structure of bovine F1-ATPase inhibited by ADP and beryllium fluoride. *EMBO J* **23**, 2734-2744, (2004).
33. Kabsch, W. Automatic processing of rotation diffraction data from crystals of initially unknown symmetry and cell constants. *Journal of Appl. Crystallogr.* **26**, 795-800, (1993).
34. McCoy, A. J. *et al.* Phaser crystallographic software. *Journal of Applied Crystallography* **40**, 658-674, (2007).
35. Bricogne, G., Vonrhein, C., Flensburg, C., Schiltz, M. & Paciorek, W. Generation, representation and flow of phase information in structure determination: recent developments in and around SHARP 2.0. *Acta crystallographica* **59**, 2023-2030, (2003).
36. Cowtan, K. The Buccaneer software for automated model building. 1. Tracing protein chains. *Acta crystallographica* **62**, 1002-1011, (2006).

37. Emsley, P. & Cowtan, K. Coot: model-building tools for molecular graphics. *Acta Crystallographica Section D-Biological Crystallography* **60**, 2126-2132, (2004).
38. Adams, P. D. *et al.* PHENIX: building new software for automated crystallographic structure determination. *Acta crystallographica* **58**, 1948-1954, (2002).
39. DeLano, W. L. The PyMOL Molecular Graphics System (San Carlos, CA: DeLano Scientific). (2002).
40. Pettersen, E. F. *et al.* UCSF Chimera--a visualization system for exploratory research and analysis. *J Comput Chem* **25**, 1605-1612, (2004).
41. Sprouse, R. O., Brenowitz, M. & Auble, D. T. Snf2/Swi2-related ATPase Mot1 drives displacement of TATA-binding protein by gripping DNA. *Embo J* **25**, 1492-1504, (2006).
42. Darst, R. P., Wang, D. & Auble, D. T. MOT1-catalyzed TBP-DNA disruption: uncoupling DNA conformational change and role of upstream DNA. *Embo J* **20**, 2028-2040, (2001).
43. Chen, H. T. & Hahn, S. Binding of TFIIB to RNA polymerase II: Mapping the binding site for the TFIIB zinc ribbon domain within the preinitiation complex. *Molecular cell* **12**, 437-447, (2003).
44. Miller, G. & Hahn, S. A DNA-tethered cleavage probe reveals the path for promoter DNA in the yeast preinitiation complex. *Nature structural & molecular biology* **13**, 603-610, (2006).
45. Auble, D. T., Wang, D., Post, K. W. & Hahn, S. Molecular analysis of the SNF2/SWI2 protein family member MOT1, an ATP-driven enzyme that dissociates TATA-binding protein from DNA. *Molecular and cellular biology* **17**, 4842-4851, (1997).
46. Ludtke, S. J., Baldwin, P. R. & Chiu, W. EMAN: semiautomated software for high-resolution single-particle reconstructions. *J Struct Biol* **128**, 82-97, (1999).
47. van Heel, M., Harauz, G., Orlova, E. V., Schmidt, R. & Schatz, M. A new generation of the IMAGIC image processing system. *J Struct Biol* **116**, 17-24, (1996).
48. Trabuco, L. G., Villa, E., Mitra, K., Frank, J. & Schulten, K. Flexible fitting of atomic structures into electron microscopy maps using molecular dynamics. *Structure* **16**, 673-683, (2008).
