# Supplementary material
Source: PubMed Central journal article supplement (PMC3276066)
Supplement: NIHMS353534-supplement-Supplementary_Information.pdf [file NIHMS353534-supplement-Supplementary_Information.pdf]

Supplementary Information

Supplementary Figures

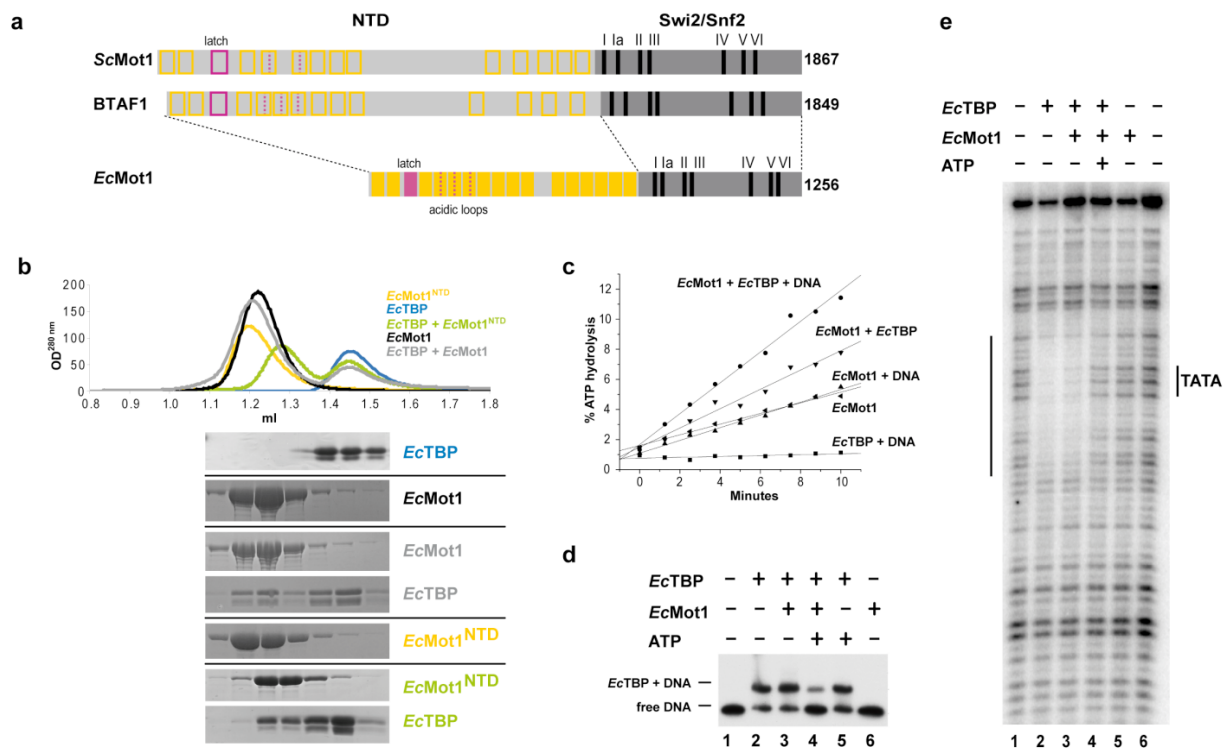

**Supplementary Figure 1. *Encephalitozoon cuniculi* (*Ec*) Mot1:TBP biochemistry.** **a**, Schematic comparison of *Ec*, *Sc* (*Saccharomyces cerevisiae*) and human Mot1 (BTAF1) with indicated sequence predicted (open yellow boxes) and structurally defined HEAT repeats (filled yellow boxes) as well as ATPase motifs I-VI. **b**, Size exclusion chromatographs of *Ec*TBP and *Ec*Mot1/*Ec*Mot1<sup>NTD</sup> with samples from corresponding fractions separated by SDS-PAGE. *Ec*TBP coelutes with *Ec*Mot1/*Ec*Mot1<sup>NTD</sup> indicating that they form a stable complex. *Ec*Mot1<sup>NTD</sup> alone has a larger hydrodynamic radius than the *Ec*Mot1<sup>NTD</sup>:*Ec*TBP complex. DLS and SLS experiments (dynamic and static light scattering, see Supplementary Table 3) revealed that *Ec*Mot1<sup>NTD</sup> forms a dimer, possibly to saturate exposed hydrophobic surfaces at the

truncated C-terminus. **c**, ATPase activity of *EcMot1* in the presence of different substrates. We used 10 nM *EcMot1* and 150 nM *EcTBP* with or without 150 nM TATA-containing DNA. *EcMot1* alone had an ATP hydrolysis rate of  $8.9 \pm 0.4$  moles ATP hydrolyzed per min per mol *EcMot1*. For comparison, the rates were  $10.3 \pm 0.3$  for *EcMot1* plus DNA and  $16.0 \pm 1.0$  for *EcMot1* plus TBP. The ATPase was most active when incubated with pre-formed TBP:DNA complexes, yielding a rate of  $25.6 \pm 1.1$ . **d**, *EcMot1* dissociates the *EcTBP*:DNA complex in an ATP-dependent reaction. Electrophoretic mobility shift assays were performed using radiolabeled TATA-containing DNA, proteins and ATP as indicated. A stable complex containing *EcMot1* was not detectable in this assay. Note that the addition of *EcMot1* and ATP resulted in a marked decrease in the abundance of the *EcTBP*:DNA complex (lane 4 versus 2, 3 and 6). **e**, Analysis of *EcMot1* activity by DNase I footprinting. Reactions contained radiolabeled TATA-containing DNA and *EcTBP*, *EcMot1* and/or ATP as indicated. Incubation of *EcTBP* with the DNA resulted in protection of a ~20 bp region bracketing the TATA sequence (denoted by the vertical bar, compare lanes 1 and 2)<sup>1</sup>. There was no detectable change in the *EcTBP* footprint when *EcMot1* was added (lane 3 versus 2). However, the addition of *EcMot1* and ATP caused *EcTBP* to be stripped from the probe (lane 4).

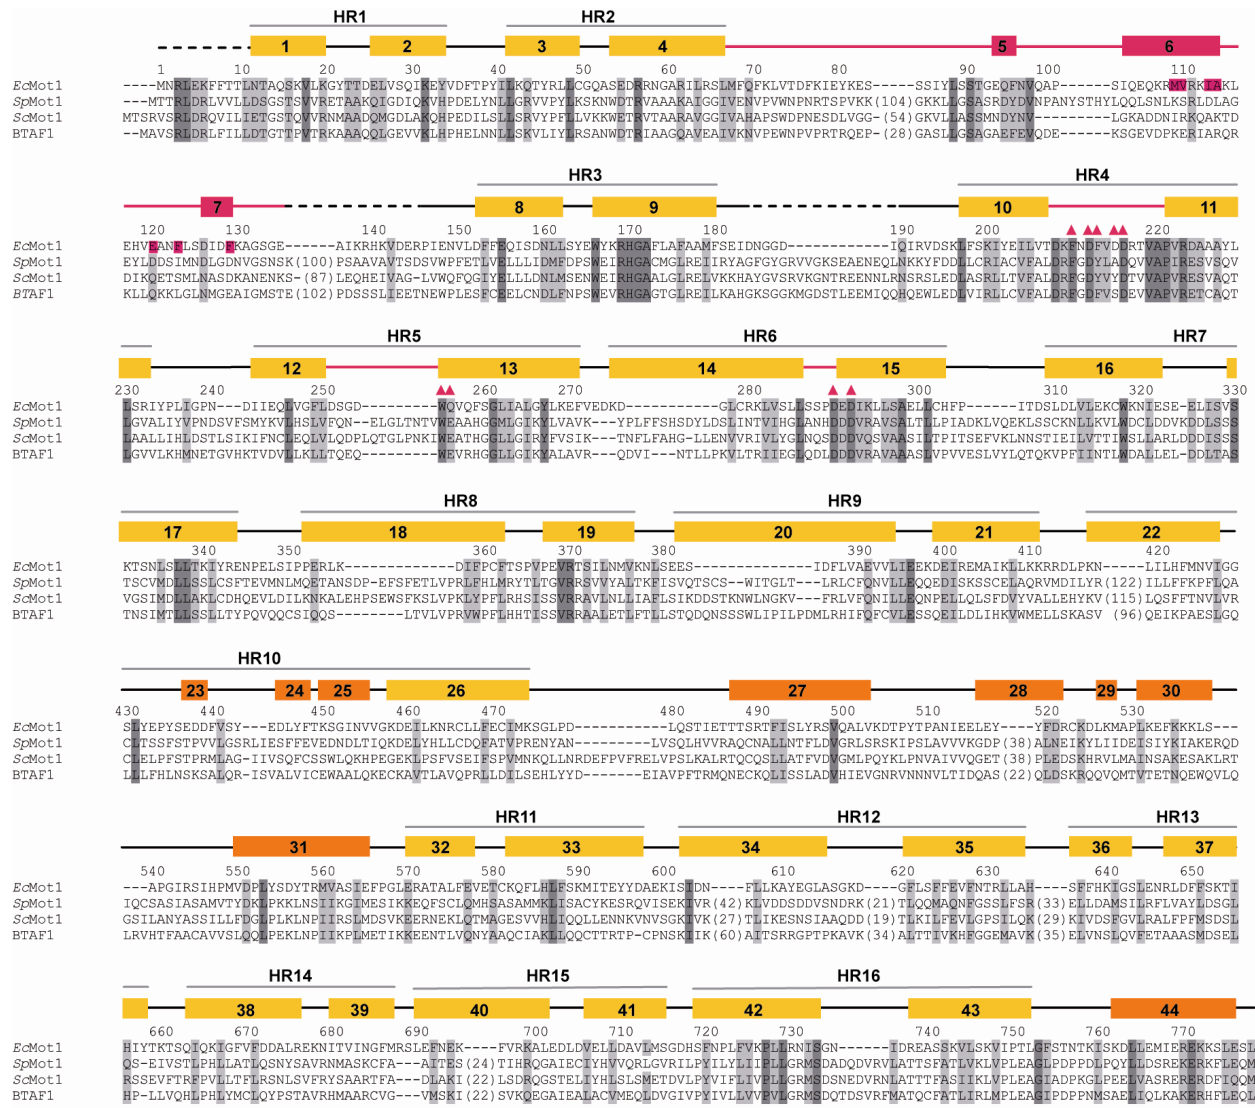

**Supplementary Figure 2. Sequence alignment of the N-terminal domain of Mot1 from different species.** Identical residues and highly conserved residues are colored in dark and light grey, respectively. Numbers on top of the alignment specify the sequence of *EcMot1*. The annotated secondary structure of *EcMot1*<sup>NTD</sup> is depicted on top of the alignment with numbers corresponding to the specified helices. Some helices are grouped to HR (HEAT repeats) by grey lines. Residues mentioned in the text are highlighted in pink or marked with a pink triangle.

Dashed lines correspond to regions without structural information. The latch (residues 101-130) and the loops of HR 4 to HR 6 are highlighted in magenta. Abbreviations: *EcMot1*, *Encephalitozoon cuniculi* Mot1; *SpMot1*, *Schizosaccharomyces pombe* Mot1; *ScMot1*, *Saccharomyces cerevisiae* Mot1; BTA1 human Mot1 homologue.

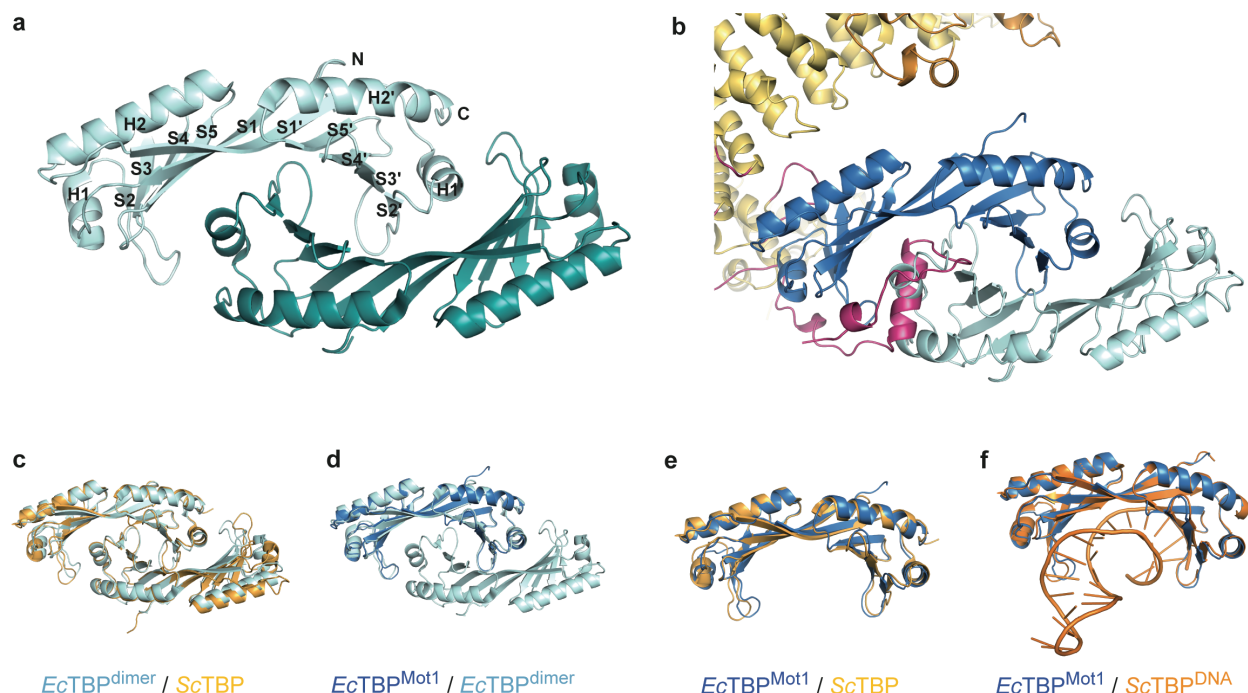

**Supplementary Figure 3. Structural comparison of *EcTBP* with other TBP structures.** **a**, Structure of dimeric *EcTBP*, crystallized in the absence of Mot1, in ribbon representation with highlighted and annotated secondary structure (monomers colored in lightblue and teal). **b**, A superposition of the *EcTBP* dimer and the *EcMot1*<sup>NTD</sup>:*EcTBP* complex illustrates how the latch (pink) directly competes with binding of a second TBP molecule (lightblue) to a TBP molecule (blue) bound by Mot1 (yellow), thereby preventing formation of TBP dimers. **c**, Superposition (r.m.s.d. 1.27 Å) of dimeric *EcTBP* (lightblue) to *ScTBP* (1TBP, lightorange<sup>2</sup>). **d**, Superposition (r.m.s.d. 0.67 Å) of dimeric *EcTBP* (lightblue) to *EcTBP*<sup>Mot1</sup> (blue, from the *EcMot1*<sup>NTD</sup>:*EcTBP* complex). **e**, Superposition (r.m.s.d 0.83 Å) of *EcTBP*<sup>Mot1</sup> (blue) to *ScTBP* (1TBP, lightorange). **f**, Superposition (r.m.s.d 0.53 Å) of *EcTBP*<sup>Mot1</sup> (blue) to *ScTBP* in complex with DNA (1YTBP, orange<sup>3</sup>).

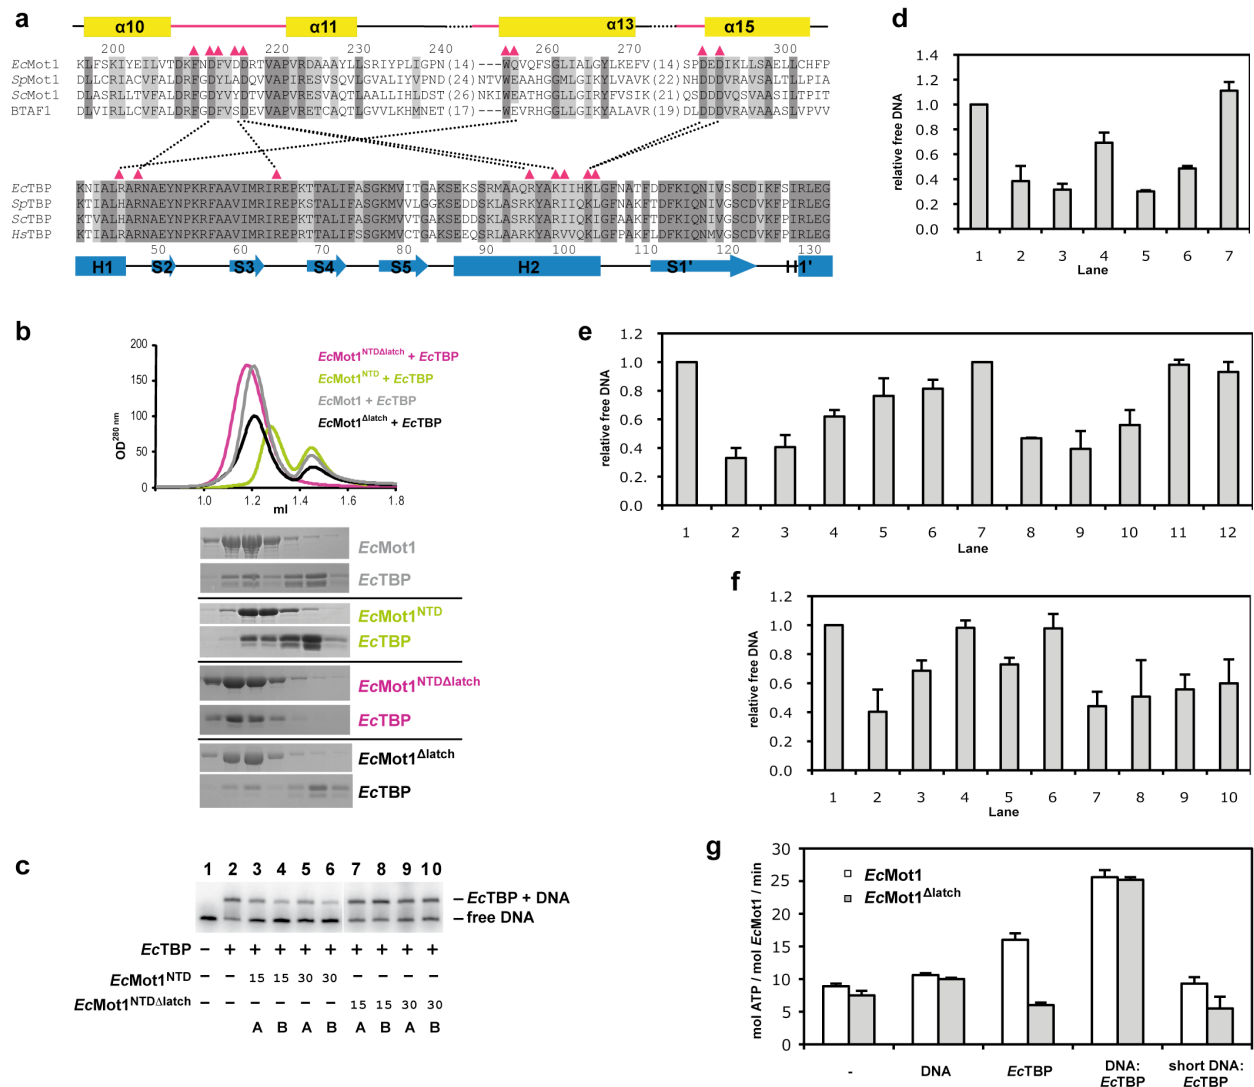

**Supplementary Figure 4. Key residues involved in *EcMot1*:*EcTBP* recognition and biochemical behavior of *EcMot1*<sup>wt/NTD/NTD $\Delta$ latch/ $\Delta$ latch</sup>.** **a**, Sequence alignment showing that the key interacting residues involved in *EcMot1*:*EcTBP* recognition are conserved (pink triangle). Abbreviations: *Ec*, *Encephalitozoon cuniculi*; *Sc*, *Saccharomyces cerevisiae*; *Sp*, *Schizosaccharomyces pombe*; *Hs*, *Homo sapiens*. **b**, In size exclusion chromatography, *EcMot1*<sup>NTD $\Delta$ latch</sup> stably binds to *EcTBP* and forms a high molecular weight complex composed of a TBP dimer and two bound *EcMot1*<sup>NTD $\Delta$ latch</sup>. In contrast, the *EcMot1*<sup>NTD</sup>:*EcTBP* complex has a smaller hydrodynamic radius and a smaller molecular weight, indicating that TBP dimerization

is prevented by the latch (see also DLS and SLS, Supplementary Table 3). Note that the *EcMot1*<sup>Δlatch</sup>:*EcTBP* complex did not form higher molecular weight complexes compared to wildtype *EcMot1*:*EcTBP* complexes. This suggests that *EcMot1*<sup>Δlatch</sup>, like *EcMot1*<sup>NTDΔlatch</sup>, fails to dissociate dimeric TBP due to the absence of the latch, but is sterically unable to bind to / dimerize via TBP dimers due to the presence of the ATPase domain. **c**, Gel mobility shift assay (EMSA) using radiolabeled TATA DNA (<1 nM), *EcTBP* (15 nM) and *EcMot1*<sup>NTD</sup> or *EcMot1*<sup>NTDΔlatch</sup>, added at a concentration of 15 nM or 30 nM, as indicated. **d**, **e**, and **f**, Quantitations of gel mobility shift assays from Figures 2e, 2f, and Supplementary Figure 4c, respectively. The bars show the relative levels of free DNA in each reaction (reactions with no added protein were normalized to 1.0). The quantitations were made by phosphorimager analysis of the EMSAs. Data represent mean and standard errors (n=2 or 3). **g**, ATPase activities of wildtype *EcMot1* compared to *EcMot1*<sup>Δlatch</sup>. ATP hydrolysis rates were measured using methods described previously<sup>1</sup>. The reactions contained 10 nM *EcMot1* or *EcMot1*<sup>Δlatch</sup>, as well as the additional components indicated below the bars including a 110 bp TATA-containing DNA fragment that supports both TBP and yeast Mot1 binding and activity<sup>1</sup>, added to 150 nM (denoted “DNA”), a TATA-containing DNA duplex that binds TBP but is too short to support yeast Mot1 binding<sup>1</sup> (denoted “short DNA”), and/or 150 nM *EcTBP*. The significantly lower ATPase activity of *EcMot1*<sup>Δlatch</sup> compared to *EcMot1* in the presence of TBP alone, may result from a different orientation of TBP on Mot1<sup>Δlatch</sup>, or transient TBP dimerization that impacts the function of the Swi2/Snf2 domain. We speculate that DNA stabilizes a more optimal orientation or prevents dimerization by binding to both TBP and the Swi2/Snf2 domain, rescuing the ATPase activity of the *EcMot1*<sup>Δlatch</sup> protein. Data represent mean and standard error (n=3).

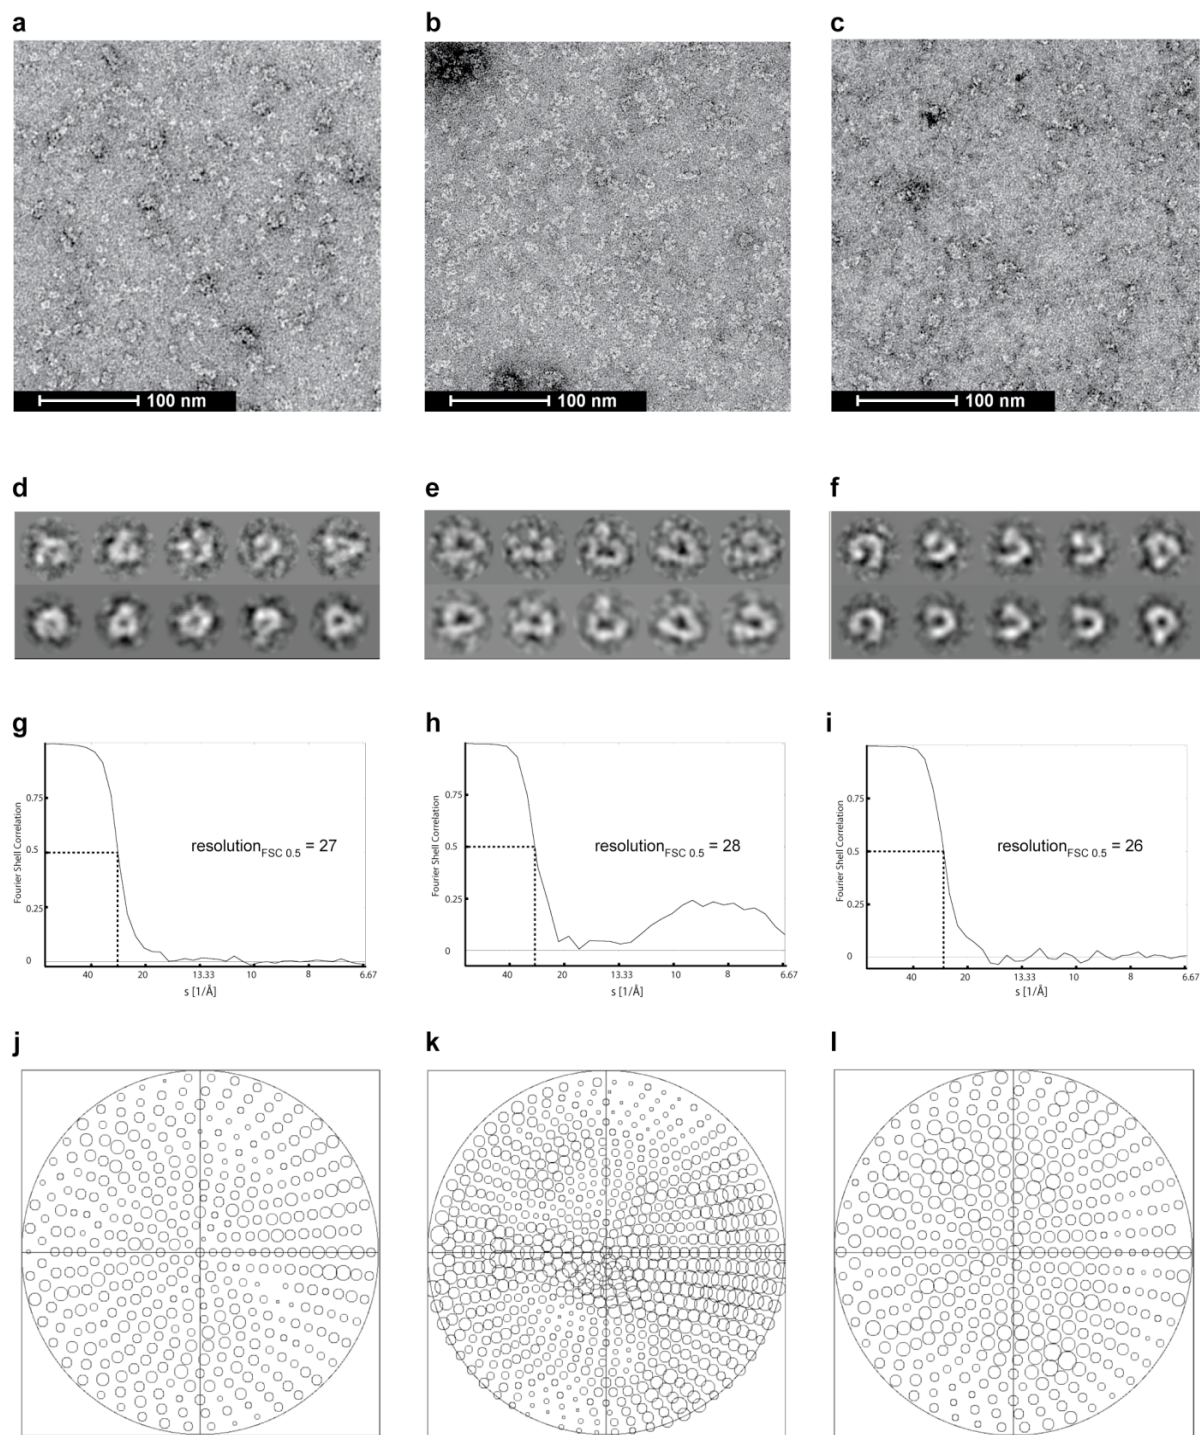

**Supplementary Figure 5. EM raw data.** Negative stain images of (a) *EcMot1*<sup>BeF</sup>:*EcTBP*, a complex of *EcMot1* and *EcTBP* in the presence of ADP-BeF<sub>3</sub><sup>-</sup>, a non-hydrolyzable ATP analogue; b, *EcMot1*<sup>E912Q</sup>, a Walker B mutant of *EcMot1*, was used so that ATP could be added

without being hydrolyzed; and **c**, the  $EcMot1^{\Delta CT}:EcTBP$  complex.  $EcMot1^{\Delta CT}$  lacks the C-terminal half of the two-lobed Swi2/Snf2 domain. Initial class averages of  $EcMot1^{BeF}:EcTBP$  (**d**, upper row),  $EcMot1^{E912Q}$  (**e**, upper row) and  $EcMot1^{\Delta CT}:EcTBP$  (**f**, upper row) obtained by multivariate statistical analysis. Each class contains approximately 10 images. The lower row shows reprojections of the initial 3D structure in the Euler angle directions assigned to the class averages. Fourier shell correlation curves of  $EcMot1^{BeF}:EcTBP$  (**g**),  $EcMot1^{E912Q}$  (**h**) and  $EcMot1^{\Delta CT}:EcTBP$  (**i**). The resolution of the map estimated by Fourier Shell Correlation with a 0.5 correlation cut-off and no masking is given. Euler angle distribution plots for  $EcMot1^{BeF}:EcTBP$  (**j**),  $EcMot1^{E912Q}$  (**k**) and  $EcMot1^{\Delta CT}:EcTBP$  (**l**) after refinement with projection matching in EMAN. Discrete directions with 5° or 7° azimuthal equidistant angular spacing are represented by circles, the size which corresponds to the number of particles matching that direction. The polar angle ( $\Theta$ ) increases from the center of the circle to the outside and the azimuthal angle ( $\Phi$ ) increases along the circumference of the circle.

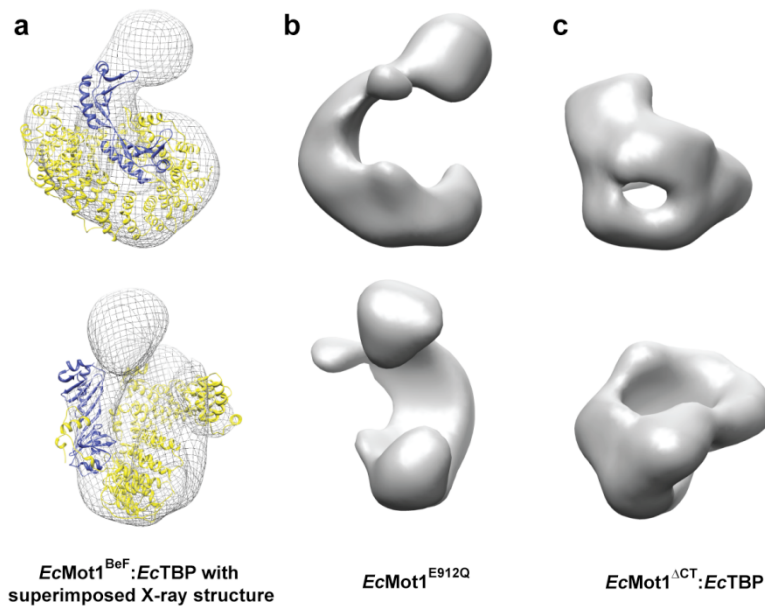

**Supplementary Figure 6. Surface representation of EM negative stained *EcMot1:EcTBP* complex densities.** **a**, Two views of the surface representation of the *EcMot1<sup>BeF</sup>:EcTBP* density with overlaid crystal structure of *EcMot1<sup>NTD</sup>:EcTBP*. The good fit indicates that ADP-BeF<sub>3</sub><sup>-</sup> binding to the ATPase domain does not strongly alter the HEAT repeat structure in the absence of DNA. **b**, Density maps for *EcMot1<sup>E912Q</sup>* using the views of (**a**) show that the lateral protrusion interpreted with TBP is missing. **c**, Density map for *EcMot1<sup>ΔCT</sup>* (an *EcMot1* variant lacking the C-terminal part of the Swi2/Snf2 ATPase), using the views in (**a**), shows that the globular protrusion is missing.

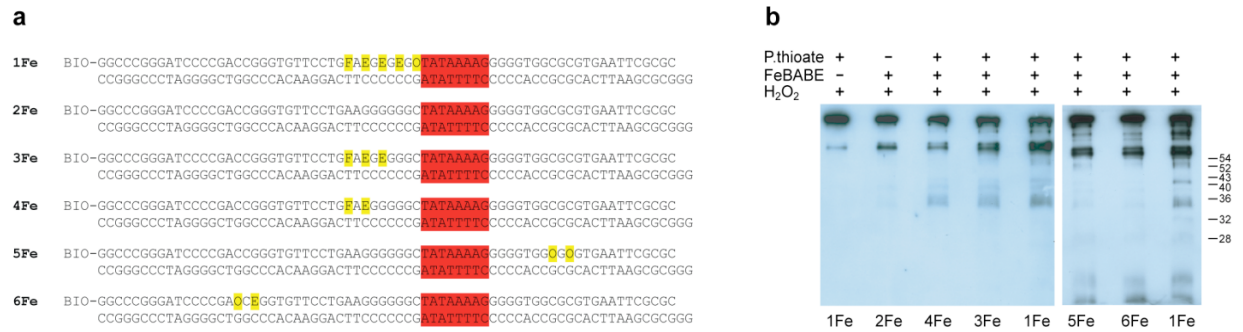

**Supplementary Figure 7. Localization of the Mot1 ATPase domain to upstream DNA. a,** DNA probes used for FeBABE mediated cleavage of Mot1. Conjugated phosphorothioates are marked in yellow (F = A-phosphorothioate, O = C-phosphorothioate, E = G-phosphorothioate, Z = T-phosphorothioate), the TATA boxes are highlighted in red. **b,** FeBABE-mediated cleavage of Mot1 analyzed by Western blot<sup>4</sup>. Approximate sizes of the cleavage products in kDa are shown in the right. Control experiments demonstrated that Mot1 binding to the DNA depends on prior incubation with TBP as expected (not shown). Additional control experiments (not shown) indicate that the very small polypeptides (<28 kD) at the very bottom of the right-hand blot in panel **b** are not specific cleavage products; they are detectable in all reactions with sufficient Western blot exposure.

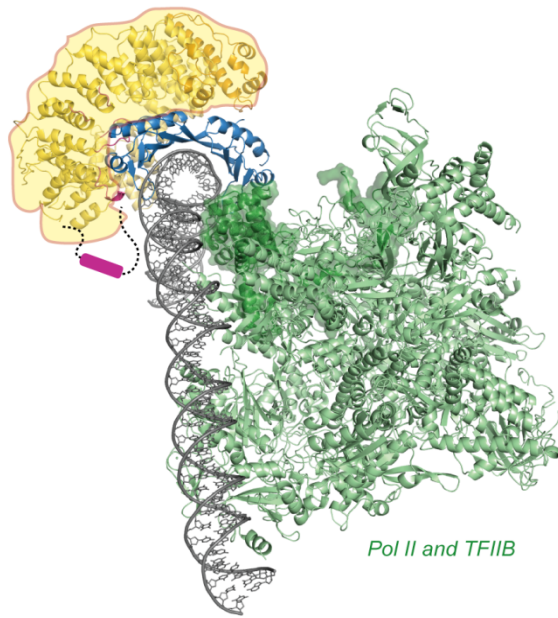

**Supplementary Figure 8. Implications for PIC recognition.** Model of how Mot1 (yellow) could theoretically bind to a minimal preinitiation complex (PIC, based on a closed promoter complex model, 3K1F, green<sup>5</sup>). The Mot1 latch is omitted from the structure and indicated by a cartoon (magenta). TBP is colored in blue and a modeled DNA is shown in grey.

## Supplementary Tables

**Supplementary Table 1. Summary of crystallographic data and refinement statistics**

|                                                         | <i>EcMot1</i> <sup>NID</sup> : <i>EcTBP</i><br>SeMet | <i>EcMot1</i> <sup>NID</sup> : <i>EcTBP</i><br>Native | <i>EcTBP</i><br>Native |
|---------------------------------------------------------|------------------------------------------------------|-------------------------------------------------------|------------------------|
| <b>Data collection</b>                                  |                                                      |                                                       |                        |
| Space group                                             | P2 <sub>1</sub>                                      | P2 <sub>1</sub>                                       | H3                     |
| Cell dimensions                                         |                                                      |                                                       |                        |
| <i>a</i> , <i>b</i> , <i>c</i> (Å)                      | 99.0, 146.8, 102.8                                   | 99.3, 147.8, 103.4                                    | 104.4, 104.4, 129.1    |
| $\alpha$ , $\beta$ , $\gamma$ (°)                       | 90.0, 90.0, 94.6                                     | 90.0, 90.0, 94.5                                      | 90.0, 90.0, 120.0      |
| Wavelength (Å)                                          | 0.9796                                               | 0.8726                                                | 1.0000                 |
| Resolution (Å)*                                         | 50.0 – 3.3 (3.4 – 3.3)                               | 50.0 – 3.1 (3.2 – 3.1)                                | 30.0 – 1.9 (2.0 – 1.9) |
| <i>R</i> <sub>sym</sub> (%)*                            | 11.8 (36.8)                                          | 6.7 (60.0)                                            | 5.5 (39.0)             |
| <i>I</i> / $\sigma$ <i>I</i> *                          | 9.9 (2.4)                                            | 17.1 (2.4)                                            | 15.1 (3.4)             |
| Completeness (%)*                                       | 95.2 (81.1)                                          | 99.7 (97.2)                                           | 90.2 (84.8)            |
| Redundancy*                                             | 4.2 (2.2)                                            | 4.3 (4.2)                                             | 3.0 (2.9)              |
| <b>Refinement</b>                                       |                                                      |                                                       |                        |
| Resolution (Å)                                          |                                                      | 3.1                                                   | 1.9                    |
| No. reflections                                         |                                                      | 54011                                                 | 36954                  |
| <i>R</i> <sub>work</sub> / <i>R</i> <sub>free</sub> (%) |                                                      | 18.7 / 24.2                                           | 17.9 / 21.5            |
| No. atoms                                               |                                                      |                                                       |                        |
| Protein                                                 |                                                      | 14984                                                 | 3027                   |
| Ligand/ion                                              |                                                      | 24                                                    | 16                     |
| Water                                                   |                                                      | 29                                                    | 305                    |
| B-factors                                               |                                                      |                                                       |                        |
| Protein                                                 |                                                      | 79.5                                                  | 30.6                   |
| Ligand/ion                                              |                                                      | 111.9                                                 | 45.7                   |
| Water                                                   |                                                      | 54.7                                                  | 40.6                   |
| R.m.s deviations                                        |                                                      |                                                       |                        |
| Bond lengths (Å)                                        |                                                      | 0.005                                                 | 0.007                  |
| Bond angles (°)                                         |                                                      | 0.868                                                 | 1.080                  |
| Ramachandran (%)                                        |                                                      |                                                       |                        |
| favoured                                                |                                                      | 91.1                                                  | 98.3                   |
| allowed                                                 |                                                      | 8.4                                                   | 1.7                    |
| outlier                                                 |                                                      | 0.5                                                   | 0.0                    |

\*Highest resolution shell is shown in parenthesis.

**Supplementary Table 1. Summary of crystallographic data and refinement statistics.**

| ScMot1 | EcMot1 | EcTBP      | ScTBP |
|--------|--------|------------|-------|
| D365   | D212   | — R48      | R90   |
| F363   | F210   | .....      |       |
| Y368   | D215   | — R65      | R107  |
| D369   | D216   | — R96      | K138  |
|        |        | ..... K99  | R141  |
| D462   | D290   | .....      |       |
| D464   | D292   | — K103     | K145  |
| W420   | W255   | .....      |       |
| E421   | Q256   | — R46      | H88   |
| Y366   | F213   | ..... I100 | I142  |
|        |        | ..... L104 | I146  |
| I164   | M109   | ..... F57  | R90   |
| R165   | V110   | .....      |       |
| A168   | I113   | ..... I61  | I103  |
|        |        | ..... L72  | L114  |
| K169   | A114   | ..... V29  | V71   |
| Q175   | E120   | — K159     | K240  |
| M179   | F123   | ..... Q116 | Q158  |
| D184   | F129   | ..... F74  | F116  |
|        |        | ..... A58  | A100  |

**Supplementary Table 2. Contact residues of *EcMot1*<sup>NTD</sup> and *EcTBP*.** Contact residues between *EcMot1*<sup>NTD</sup> and *EcTBP*, along with corresponding residues in *Saccharomyces cerevisiae* (*Sc*). Solid lines indicate a bonded interaction whereas dashed lines represent hydrophobic interactions. Residues known to influence the interaction of Mot1 and TBP are highlighted in blue<sup>6</sup>.

| Dynamic Light Scattering                                            | Hydrodynamic radius (nm) |                | Corresponding MW of a globular protein (kDa)      | Expected MW from sequence content (kDa) | Oligomeric state     |
|---------------------------------------------------------------------|--------------------------|----------------|---------------------------------------------------|-----------------------------------------|----------------------|
| <i>EcMot1</i> <sup>NTD</sup>                                        | 6.4                      |                | 262                                               | 92                                      | Homodimer            |
| <i>EcMot1</i> <sup>NTD</sup> : <i>EcTBP</i>                         | 5.2                      |                | 162                                               | 116                                     | Heterodimer          |
| <i>EcMot1</i> <sup>NTD<math>\Delta</math>latch</sup>                | 6.2                      |                | 245                                               | 88                                      | Homodimer            |
| <i>EcMot1</i> <sup>NTD<math>\Delta</math>latch</sup> : <i>EcTBP</i> | 6.1                      |                | 233                                               | 112                                     | Dimer of heterodimer |
| Static Light Scattering                                             | M <sub>n</sub>           | M <sub>w</sub> | Polydispersity (M <sub>w</sub> / M <sub>n</sub> ) | Expected MW from sequence content (kDa) | Oligomeric state     |
| <i>EcTBP</i>                                                        | 63.7                     | 64.5           | 1.012                                             | 24                                      | Homodimer            |
| <i>EcMot1</i> <sup>NTD<math>\Delta</math>latch</sup>                | 173.9                    | 174.2          | 1.001                                             | 88                                      | Homodimer            |
| <i>EcMot1</i> <sup>NTD</sup> : <i>EcTBP</i>                         | 128.2                    | 129.8          | 1.013                                             | 116                                     | Heterodimer          |
| <i>EcMot1</i> <sup>NTD<math>\Delta</math>latch</sup> : <i>EcTBP</i> | 224.0                    | 225.6          | 1.007                                             | 112                                     | Dimer of heterodimer |
| <i>EcMot1</i>                                                       | 161.0                    | 161.5          | 1.003                                             | 147                                     | Monomer              |

**Supplementary Table 3. Dynamic light scattering and static light scattering.** The table summarizes results from dynamic light scattering (DLS) and static light scattering (SLS) experiments and includes most probable oligomeric states of the proteins. The absolute molecular weights in dynamic light scattering can substantially differ from the calculated molecular weights since they rely on globular shaped proteins. The obtained molecular weights from static light scattering are in good agreement with the estimated molecular weights from analytical size exclusion chromatography. *EcMot1*<sup>NTD</sup> and *EcMot1*<sup>NTD $\Delta$ latch</sup> form homodimers. In contrast, the *EcMot1*<sup>NTD</sup>:*EcTBP* complex has a reduced hydrodynamic radius / molecular weight, consistent with a 1:1 heterodimer, whereas the *EcMot1*<sup>NTD $\Delta$ latch</sup>:*EcTBP* complex forms a heterotetramer. Together with size exclusion experiments, this analysis shows that the Mot1 latch is needed for preventing the formation of TBP dimers.

## Supplementary References

1. Sprouse, R. O., Brenowitz, M. & Auble, D. T. Snf2/Swi2-related ATPase Mot1 drives displacement of TATA-binding protein by gripping DNA. *Embo J* **25**, 1492-1504, (2006).
2. Chasman, D. I., Flaherty, K. M., Sharp, P. A. & Kornberg, R. D. Crystal structure of yeast TATA-binding protein and model for interaction with DNA. *Proceedings of the National Academy of Sciences of the United States of America* **90**, 8174-8178, (1993).
3. Kim, Y., Geiger, J. H., Hahn, S. & Sigler, P. B. Crystal structure of a yeast TBP/TATA-box complex. *Nature* **365**, 512-520, (1993).
4. Auble, D. T., Wang, D., Post, K. W. & Hahn, S. Molecular analysis of the SNF2/SWI2 protein family member MOT1, an ATP-driven enzyme that dissociates TATA-binding protein from DNA. *Molecular and cellular biology* **17**, 4842-4851, (1997).
5. Kostrewa, D. *et al.* RNA polymerase II-TFIIB structure and mechanism of transcription initiation. *Nature* **462**, 323-330, (2009).
6. Darst, R. P. *et al.* Mot1 regulates the DNA binding activity of free TATA-binding protein in an ATP-dependent manner. *The Journal of biological chemistry* **278**, 13216-13226, (2003).
